# Supplementary material
Source: publisher figshare collection journal article supplement (https://acs.figshare.com/ndownloader/files/4419667)
Supplement: Supplementary file 1 [file 4419667]

  
data_9-OMe 
  
_audit_creation_method            SHELXL-97 
_chemical_name_systematic 
; 
 ? 
; 
_chemical_name_common             ? 
_chemical_melting_point           ? 
_chemical_formula_moiety          ? 
_chemical_formula_sum 
 'C59 H53 Fe O4 P3' 
_chemical_formula_weight          974.839 
  
loop_ 
 _atom_type_symbol 
 _atom_type_description 
 _atom_type_scat_dispersion_real 
 _atom_type_scat_dispersion_imag 
 _atom_type_scat_source 
 'C'  'C'   0.0033   0.0016 
 'International Tables Vol C Tables 4.2.6.8 and 6.1.1.4' 
 'H'  'H'   0.0000   0.0000 
 'International Tables Vol C Tables 4.2.6.8 and 6.1.1.4' 
 'O'  'O'   0.0106   0.0060 
 'International Tables Vol C Tables 4.2.6.8 and 6.1.1.4' 
 'P'  'P'   0.1023   0.0942 
 'International Tables Vol C Tables 4.2.6.8 and 6.1.1.4' 
 'Fe'  'Fe'   0.3463   0.8444 
 'International Tables Vol C Tables 4.2.6.8 and 6.1.1.4' 
  
_symmetry_cell_setting            Monoclinic 
_symmetry_space_group_name_H-M    P2(1)/n 
  
loop_ 
 _symmetry_equiv_pos_as_xyz 
 'x, y, z' 
 '-x+1/2, y+1/2, -z+1/2' 
 '-x, -y, -z' 
 'x-1/2, -y-1/2, z-1/2' 
  
_cell_length_a                    9.9968(5) 
_cell_length_b                    25.2550(12) 
_cell_length_c                    22.4254(11) 
_cell_angle_alpha                 90.00 
_cell_angle_beta                  96.1730(10) 
_cell_angle_gamma                 90.00 
_cell_volume                      5628.9(5) 
_cell_formula_units_Z             4 
_cell_measurement_temperature     100(2) 
_cell_measurement_reflns_used     7237 
_cell_measurement_theta_min       2.20 
_cell_measurement_theta_max       27.48 
  
_exptl_crystal_description        Block 
_exptl_crystal_colour             Orange 
_exptl_crystal_size_max           0.20 
_exptl_crystal_size_mid           0.19 
_exptl_crystal_size_min           0.10 
_exptl_crystal_density_meas       0 
_exptl_crystal_density_diffrn     1.320 
_exptl_crystal_density_method     'not measured' 
_exptl_crystal_F_000              2360 
_exptl_absorpt_coefficient_mu     0.407 
_exptl_absorpt_correction_type    'multi-scan' 
_exptl_absorpt_correction_T_min   0.812 
_exptl_absorpt_correction_T_max   1.000 
_exptl_absorpt_process_details    SADABS 
  
_exptl_special_details 
; 
 ? 
; 
  
_diffrn_ambient_temperature       100(2) 
_diffrn_radiation_wavelength      0.71073 
_diffrn_radiation_type            MoK\a 
_diffrn_radiation_source          'fine-focus sealed tube' 
_diffrn_radiation_monochromator   graphite 
_diffrn_measurement_device_type   'CCD area detector' 
_diffrn_measurement_method        'phi and omega scans' 
_diffrn_detector_area_resol_mean  ? 
_diffrn_standards_number          ? 
_diffrn_standards_interval_count  ? 
_diffrn_standards_interval_time   ? 
_diffrn_standards_decay_%         ? 
_diffrn_reflns_number             34847 
_diffrn_reflns_av_R_equivalents   0.0343 
_diffrn_reflns_av_sigmaI/netI     0.0457 
_diffrn_reflns_limit_h_min        -12 
_diffrn_reflns_limit_h_max        12 
_diffrn_reflns_limit_k_min        -23 
_diffrn_reflns_limit_k_max        32 
_diffrn_reflns_limit_l_min        -28 
_diffrn_reflns_limit_l_max        28 
_diffrn_reflns_theta_min          1.22 
_diffrn_reflns_theta_max          27.51 
_reflns_number_total              12546 
_reflns_number_gt                 9896 
_reflns_threshold_expression      >2sigma(I) 
  
_computing_data_collection        'Bruker SMART' 
_computing_cell_refinement        'Bruker SMART' 
_computing_data_reduction         'Bruker SAINT' 
_computing_structure_solution     'SHELXS-97 (Sheldrick, 1990)' 
_computing_structure_refinement   'SHELXL-97 (Sheldrick, 1997)' 
_computing_molecular_graphics     'Bruker SHELXTL' 
_computing_publication_material   'Bruker SHELXTL' 
  
_refine_special_details 
; 
 Refinement of F^2^ against ALL reflections.  The weighted R-factor wR and 
 goodness of fit S are based on F^2^, conventional R-factors R are based 
 on F, with F set to zero for negative F^2^. The threshold expression of 
 F^2^ > 2sigma(F^2^) is used only for calculating R-factors(gt) etc. and is 
 not relevant to the choice of reflections for refinement.  R-factors based 
 on F^2^ are statistically about twice as large as those based on F, and R- 
 factors based on ALL data will be even larger. 

 Two disordered solvent THF molecules were treated by SQUEEZE; the 
 correction of the X-ray data is 316 e/cell, the required value is
 336 e/cell.
; 
  
_refine_ls_structure_factor_coef  Fsqd 
_refine_ls_matrix_type            full 
_refine_ls_weighting_scheme       calc 
_refine_ls_weighting_details 
 'calc w=1/[\s^2^(Fo^2^)+(0.0966P)^2^+2.0495P] where P=(Fo^2^+2Fc^2^)/3' 
_atom_sites_solution_primary      direct 
_atom_sites_solution_secondary    difmap 
_atom_sites_solution_hydrogens    geom 
_refine_ls_hydrogen_treatment     mixed 
_refine_ls_extinction_method      none 
_refine_ls_extinction_coef        ? 
_refine_ls_number_reflns          12546 
_refine_ls_number_parameters      605 
_refine_ls_number_restraints      0 
_refine_ls_R_factor_all           0.0713 
_refine_ls_R_factor_gt            0.0587 
_refine_ls_wR_factor_ref          0.1633 
_refine_ls_wR_factor_gt           0.1575 
_refine_ls_goodness_of_fit_ref    1.088 
_refine_ls_restrained_S_all       1.088 
_refine_ls_shift/su_max           0.001 
_refine_ls_shift/su_mean          0.000 
  
loop_ 
 _atom_site_label 
 _atom_site_type_symbol 
 _atom_site_fract_x 
 _atom_site_fract_y 
 _atom_site_fract_z 
 _atom_site_U_iso_or_equiv 
 _atom_site_adp_type 
 _atom_site_occupancy 
 _atom_site_symmetry_multiplicity 
 _atom_site_calc_flag 
 _atom_site_refinement_flags 
 _atom_site_disorder_assembly 
 _atom_site_disorder_group 
Fe1 Fe 0.04011(3) 0.131822(15) 0.720183(16) 0.01530(11) Uani 1 1 d . . . 
P1 P 0.15573(6) 0.20648(3) 0.73227(3) 0.01506(15) Uani 1 1 d . . . 
P2 P 0.13786(6) 0.11607(3) 0.63855(3) 0.01439(15) Uani 1 1 d . . . 
P3 P 0.19964(6) 0.09064(3) 0.77729(3) 0.01510(15) Uani 1 1 d . . . 
O3 O 0.2357(2) 0.23134(8) 0.35414(9) 0.0256(4) Uani 1 1 d . . . 
O1 O 0.1225(2) 0.30770(9) 0.35996(10) 0.0305(5) Uani 1 1 d . . . 
O4 O 0.6321(2) 0.07857(8) 0.56905(9) 0.0269(4) Uani 1 1 d . . . 
O2 O 0.4891(2) 0.08528(8) 0.48509(9) 0.0312(5) Uani 1 1 d . . . 
C3 C 0.3637(3) 0.29201(11) 0.48201(12) 0.0210(6) Uani 1 1 d . . . 
C2 C 0.2966(3) 0.28567(11) 0.43481(12) 0.0223(6) Uani 1 1 d . . . 
C1 C 0.2091(3) 0.27773(11) 0.38051(12) 0.0210(6) Uani 1 1 d . . . 
C12 C 0.1485(3) 0.21922(14) 0.30026(14) 0.0354(7) Uani 1 1 d . . . 
H12A H 0.1746 0.1851 0.2842 0.053 Uiso 1 1 calc R . . 
H12B H 0.1565 0.2470 0.2704 0.053 Uiso 1 1 calc R . . 
H12C H 0.0551 0.2173 0.3097 0.053 Uiso 1 1 calc R . . 
C9 C 0.5455(3) 0.20734(11) 0.55212(11) 0.0187(5) Uani 1 1 d . . . 
C10 C 0.5581(3) 0.16170(11) 0.53929(11) 0.0213(6) Uani 1 1 d . . . 
C11 C 0.5537(3) 0.10622(11) 0.52713(12) 0.0206(5) Uani 1 1 d . . . 
C13 C 0.6287(3) 0.02173(11) 0.56200(14) 0.0279(6) Uani 1 1 d . . . 
H13A H 0.6884 0.0053 0.5944 0.042 Uiso 1 1 calc R . . 
H13B H 0.6589 0.0123 0.5232 0.042 Uiso 1 1 calc R . . 
H13C H 0.5366 0.0090 0.5636 0.042 Uiso 1 1 calc R . . 
C4 C 0.4431(3) 0.29920(11) 0.53741(12) 0.0201(5) Uani 1 1 d . . . 
C8 C 0.5292(3) 0.26042(10) 0.56914(12) 0.0194(5) Uani 1 1 d . . . 
C7 C 0.5894(3) 0.28441(11) 0.62193(12) 0.0232(6) Uani 1 1 d . . . 
H7A H 0.6510 0.2681 0.6515 0.028 Uiso 1 1 calc R . . 
C6 C 0.5430(3) 0.33645(12) 0.62319(13) 0.0261(6) Uani 1 1 d . . . 
H6A H 0.5688 0.3616 0.6538 0.031 Uiso 1 1 calc R . . 
C5 C 0.4530(3) 0.34583(11) 0.57259(13) 0.0233(6) Uani 1 1 d . . . 
H5A H 0.4062 0.3780 0.5632 0.028 Uiso 1 1 calc R . . 
C34 C -0.1248(3) 0.07873(14) 0.70776(17) 0.0367(8) Uani 1 1 d . . . 
H14A H -0.1207 0.0415 0.6928 0.044 Uiso 1 1 calc R . . 
C35 C -0.1061(3) 0.09373(17) 0.76629(18) 0.0443(9) Uani 1 1 d . . . 
H15A H -0.0870 0.0693 0.8013 0.053 Uiso 1 1 calc R . . 
C36 C -0.1193(3) 0.1483(2) 0.76961(18) 0.0703(17) Uani 1 1 d . . . 
H16A H -0.1152 0.1700 0.8071 0.084 Uiso 1 1 calc R . . 
C37 C -0.1482(3) 0.16812(13) 0.70729(18) 0.0393(9) Uani 1 1 d . . . 
H17A H -0.1695 0.2052 0.6938 0.047 Uiso 1 1 calc R . . 
C38 C -0.1518(3) 0.12261(12) 0.67247(14) 0.0260(6) Uani 1 1 d . . . 
H18A H -0.1700 0.1220 0.6278 0.031 Uiso 1 1 calc R . . 
C39 C 0.3873(3) 0.14439(10) 0.70826(11) 0.0170(5) Uani 1 1 d . . . 
C20 C 0.3400(2) 0.19758(10) 0.73105(12) 0.0178(5) Uani 1 1 d . . . 
H20A H 0.3727 0.2259 0.7058 0.021 Uiso 1 1 calc R . . 
H20B H 0.3838 0.2029 0.7723 0.021 Uiso 1 1 calc R . . 
C21 C 0.3188(2) 0.13342(10) 0.64485(11) 0.0168(5) Uani 1 1 d . . . 
H21A H 0.3676 0.1041 0.6274 0.020 Uiso 1 1 calc R . . 
H21B H 0.3294 0.1652 0.6200 0.020 Uiso 1 1 calc R . . 
C22 C 0.3679(2) 0.09800(11) 0.75106(11) 0.0174(5) Uani 1 1 d . . . 
H22A H 0.4346 0.1018 0.7867 0.021 Uiso 1 1 calc R . . 
H22B H 0.3891 0.0647 0.7307 0.021 Uiso 1 1 calc R . . 
C23 C 0.5390(2) 0.14820(11) 0.70395(12) 0.0188(5) Uani 1 1 d . . . 
H23A H 0.5569 0.1773 0.6770 0.028 Uiso 1 1 calc R . . 
H23B H 0.5711 0.1149 0.6882 0.028 Uiso 1 1 calc R . . 
H23C H 0.5860 0.1548 0.7439 0.028 Uiso 1 1 calc R . . 
C24 C 0.1564(3) 0.24920(10) 0.79854(11) 0.0171(5) Uani 1 1 d . . . 
C25 C 0.0970(3) 0.23720(10) 0.84978(11) 0.0188(5) Uani 1 1 d . . . 
H25A H 0.0525 0.2042 0.8526 0.023 Uiso 1 1 calc R . . 
C26 C 0.1018(3) 0.27280(11) 0.89707(12) 0.0215(6) Uani 1 1 d . . . 
H26A H 0.0592 0.2643 0.9317 0.026 Uiso 1 1 calc R . . 
C27 C 0.1680(3) 0.32029(11) 0.89397(12) 0.0206(5) Uani 1 1 d . . . 
H27A H 0.1703 0.3448 0.9262 0.025 Uiso 1 1 calc R . . 
C28 C 0.2314(3) 0.33244(11) 0.84352(12) 0.0228(6) Uani 1 1 d . . . 
H28A H 0.2790 0.3649 0.8417 0.027 Uiso 1 1 calc R . . 
C29 C 0.2252(3) 0.29735(11) 0.79609(12) 0.0206(5) Uani 1 1 d . . . 
H29A H 0.2679 0.3059 0.7615 0.025 Uiso 1 1 calc R . . 
C100 C 0.1048(3) 0.25816(10) 0.67599(11) 0.0159(5) Uani 1 1 d . . . 
C101 C -0.0112(3) 0.28748(11) 0.68409(12) 0.0193(5) Uani 1 1 d . . . 
H31A H -0.0569 0.2812 0.7184 0.023 Uiso 1 1 calc R . . 
C102 C -0.0600(3) 0.32552(11) 0.64265(13) 0.0223(6) Uani 1 1 d . . . 
H32A H -0.1388 0.3450 0.6486 0.027 Uiso 1 1 calc R . . 
C103 C 0.0065(3) 0.33504(10) 0.59249(12) 0.0203(5) Uani 1 1 d . . . 
H33A H -0.0265 0.3610 0.5640 0.024 Uiso 1 1 calc R . . 
C14 C 0.1210(3) 0.30651(11) 0.58412(12) 0.0208(5) Uani 1 1 d . . . 
H34A H 0.1662 0.3128 0.5496 0.025 Uiso 1 1 calc R . . 
C15 C 0.1703(3) 0.26874(10) 0.62590(11) 0.0179(5) Uani 1 1 d . . . 
H35A H 0.2501 0.2499 0.6200 0.022 Uiso 1 1 calc R . . 
C16 C 0.0798(3) 0.14867(10) 0.56718(11) 0.0169(5) Uani 1 1 d . . . 
C17 C -0.0312(3) 0.18202(11) 0.55948(12) 0.0226(6) Uani 1 1 d . . . 
H37A H -0.0822 0.1884 0.5922 0.027 Uiso 1 1 calc R . . 
C18 C -0.0688(3) 0.20625(11) 0.50429(13) 0.0246(6) Uani 1 1 d . . . 
H38A H -0.1466 0.2280 0.4991 0.029 Uiso 1 1 calc R . . 
C19 C 0.0073(3) 0.19847(11) 0.45754(13) 0.0255(6) Uani 1 1 d . . . 
H39A H -0.0174 0.2153 0.4201 0.031 Uiso 1 1 calc R . . 
C120 C 0.1203(3) 0.16601(12) 0.46482(13) 0.0251(6) Uani 1 1 d . . . 
H120A H 0.1734 0.1612 0.4326 0.030 Uiso 1 1 calc R . . 
C121 C 0.1556(3) 0.14080(11) 0.51901(12) 0.0205(5) Uani 1 1 d . . . 
H121A H 0.2316 0.1180 0.5235 0.025 Uiso 1 1 calc R . . 
C122 C 0.1321(3) 0.04681(10) 0.61194(11) 0.0169(5) Uani 1 1 d . . . 
C123 C 0.0076(3) 0.02620(11) 0.58781(12) 0.0220(6) Uani 1 1 d . . . 
H123A H -0.0705 0.0479 0.5855 0.026 Uiso 1 1 calc R . . 
C124 C -0.0022(3) -0.02543(12) 0.56734(13) 0.0261(6) Uani 1 1 d . . . 
H124A H -0.0872 -0.0390 0.5513 0.031 Uiso 1 1 calc R . . 
C125 C 0.1108(3) -0.05762(11) 0.56992(13) 0.0254(6) Uani 1 1 d . . . 
H125A H 0.1036 -0.0931 0.5559 0.031 Uiso 1 1 calc R . . 
C126 C 0.2335(3) -0.03749(11) 0.59302(12) 0.0228(6) Uani 1 1 d . . . 
H126A H 0.3118 -0.0589 0.5940 0.027 Uiso 1 1 calc R . . 
C127 C 0.2435(3) 0.01392(11) 0.61490(12) 0.0201(5) Uani 1 1 d . . . 
H127A H 0.3282 0.0268 0.6322 0.024 Uiso 1 1 calc R . . 
C128 C 0.1956(3) 0.01897(10) 0.78921(11) 0.0173(5) Uani 1 1 d . . . 
C129 C 0.2795(3) -0.00270(11) 0.83695(13) 0.0244(6) Uani 1 1 d . . . 
H129A H 0.3345 0.0199 0.8630 0.029 Uiso 1 1 calc R . . 
C90 C 0.2830(3) -0.05710(12) 0.84658(14) 0.0324(7) Uani 1 1 d . . . 
H50A H 0.3399 -0.0714 0.8793 0.039 Uiso 1 1 calc R . . 
C91 C 0.2042(3) -0.09033(12) 0.80879(14) 0.0315(7) Uani 1 1 d . . . 
H51A H 0.2062 -0.1275 0.8156 0.038 Uiso 1 1 calc R . . 
C92 C 0.1230(3) -0.06970(11) 0.76142(13) 0.0259(6) Uani 1 1 d . . . 
H52A H 0.0692 -0.0928 0.7353 0.031 Uiso 1 1 calc R . . 
C93 C 0.1181(3) -0.01544(11) 0.75098(12) 0.0212(5) Uani 1 1 d . . . 
H53A H 0.0619 -0.0017 0.7177 0.025 Uiso 1 1 calc R . . 
C94 C 0.2208(3) 0.11223(10) 0.85606(11) 0.0173(5) Uani 1 1 d . . . 
C95 C 0.1222(3) 0.09775(11) 0.89265(12) 0.0218(6) Uani 1 1 d . . . 
H55A H 0.0509 0.0751 0.8772 0.026 Uiso 1 1 calc R . . 
C96 C 0.1268(3) 0.11592(12) 0.95097(13) 0.0249(6) Uani 1 1 d . . . 
H56A H 0.0579 0.1064 0.9750 0.030 Uiso 1 1 calc R . . 
C97 C 0.2333(3) 0.14830(12) 0.97465(12) 0.0263(6) Uani 1 1 d . . . 
H57A H 0.2359 0.1614 1.0145 0.032 Uiso 1 1 calc R . . 
C98 C 0.3331(3) 0.16089(11) 0.94020(12) 0.0239(6) Uani 1 1 d . . . 
H58A H 0.4069 0.1818 0.9568 0.029 Uiso 1 1 calc R . . 
C99 C 0.3284(3) 0.14335(11) 0.88063(12) 0.0200(5) Uani 1 1 d . . . 
H59A H 0.3983 0.1526 0.8570 0.024 Uiso 1 1 calc R . . 
  
loop_ 
 _atom_site_aniso_label 
 _atom_site_aniso_U_11 
 _atom_site_aniso_U_22 
 _atom_site_aniso_U_33 
 _atom_site_aniso_U_23 
 _atom_site_aniso_U_13 
 _atom_site_aniso_U_12 
Fe1 0.01095(18) 0.0197(2) 0.01523(19) -0.00013(14) 0.00138(13) -0.00098(13) 
P1 0.0165(3) 0.0156(3) 0.0131(3) -0.0009(2) 0.0014(2) 0.0009(2) 
P2 0.0141(3) 0.0150(3) 0.0137(3) -0.0011(2) -0.0003(2) 0.0003(2) 
P3 0.0154(3) 0.0154(3) 0.0143(3) 0.0001(2) 0.0004(2) -0.0011(2) 
O3 0.0231(10) 0.0303(11) 0.0225(10) -0.0007(8) -0.0024(8) 0.0062(8) 
O1 0.0248(11) 0.0312(12) 0.0344(12) 0.0047(9) -0.0024(9) 0.0076(9) 
O4 0.0327(11) 0.0180(10) 0.0275(11) -0.0011(8) -0.0085(9) -0.0020(8) 
O2 0.0404(13) 0.0241(11) 0.0263(11) -0.0031(9) -0.0093(9) -0.0001(9) 
C3 0.0193(13) 0.0191(14) 0.0258(14) 0.0021(11) 0.0080(11) 0.0028(10) 
C2 0.0217(14) 0.0214(14) 0.0242(14) 0.0029(11) 0.0037(11) 0.0052(11) 
C1 0.0183(13) 0.0249(14) 0.0212(13) 0.0041(11) 0.0078(10) 0.0006(11) 
C12 0.0367(18) 0.043(2) 0.0251(16) -0.0059(14) -0.0018(13) 0.0026(14) 
C9 0.0172(12) 0.0238(14) 0.0151(12) 0.0018(10) 0.0023(9) -0.0017(10) 
C10 0.0228(14) 0.0255(15) 0.0151(12) 0.0011(11) 0.0001(10) -0.0020(11) 
C11 0.0203(13) 0.0242(14) 0.0179(13) -0.0010(11) 0.0050(10) -0.0021(11) 
C13 0.0294(15) 0.0191(14) 0.0334(16) -0.0001(12) -0.0050(12) -0.0014(11) 
C4 0.0185(13) 0.0219(14) 0.0204(13) -0.0016(11) 0.0049(10) -0.0020(10) 
C8 0.0198(13) 0.0190(14) 0.0198(13) 0.0002(10) 0.0047(10) -0.0031(10) 
C7 0.0232(14) 0.0257(15) 0.0206(13) -0.0005(11) 0.0009(11) -0.0030(11) 
C6 0.0272(15) 0.0238(15) 0.0273(15) -0.0092(12) 0.0039(11) -0.0054(11) 
C5 0.0241(14) 0.0190(14) 0.0283(15) -0.0019(11) 0.0095(11) -0.0010(11) 
C34 0.0167(14) 0.0355(18) 0.057(2) 0.0055(16) -0.0018(14) -0.0082(12) 
C35 0.0256(17) 0.064(3) 0.045(2) 0.0132(19) 0.0123(15) -0.0084(16) 
C36 0.0062(14) 0.156(5) 0.050(2) -0.072(3) 0.0130(14) -0.017(2) 
C37 0.0118(14) 0.0279(17) 0.078(3) -0.0083(16) 0.0047(15) 0.0055(11) 
C38 0.0116(12) 0.0352(17) 0.0301(15) -0.0007(13) -0.0019(11) -0.0022(11) 
C39 0.0154(12) 0.0195(13) 0.0159(12) -0.0007(10) 0.0009(9) -0.0003(10) 
C20 0.0148(12) 0.0179(13) 0.0204(13) -0.0014(10) 0.0009(10) -0.0045(10) 
C21 0.0155(12) 0.0189(13) 0.0169(12) -0.0014(10) 0.0059(10) -0.0018(9) 
C22 0.0132(12) 0.0216(13) 0.0173(12) 0.0021(10) 0.0014(9) 0.0002(10) 
C23 0.0123(12) 0.0240(14) 0.0201(13) -0.0022(11) 0.0017(9) 0.0003(10) 
C24 0.0207(13) 0.0171(13) 0.0132(11) -0.0022(10) 0.0015(9) 0.0032(10) 
C25 0.0223(13) 0.0164(13) 0.0183(12) -0.0005(10) 0.0042(10) -0.0018(10) 
C26 0.0276(14) 0.0233(14) 0.0143(12) -0.0038(10) 0.0062(10) -0.0030(11) 
C27 0.0271(14) 0.0181(13) 0.0164(12) -0.0049(10) 0.0014(10) -0.0011(10) 
C28 0.0270(15) 0.0193(14) 0.0221(13) -0.0010(11) 0.0022(11) -0.0062(11) 
C29 0.0246(14) 0.0232(14) 0.0149(12) 0.0034(10) 0.0062(10) -0.0013(11) 
C100 0.0190(12) 0.0137(12) 0.0144(12) -0.0016(9) -0.0002(9) -0.0011(9) 
C101 0.0206(13) 0.0201(14) 0.0178(12) 0.0004(10) 0.0043(10) -0.0025(10) 
C102 0.0177(13) 0.0209(14) 0.0277(14) -0.0009(11) -0.0007(11) 0.0027(10) 
C103 0.0222(13) 0.0172(13) 0.0199(13) 0.0015(10) -0.0051(10) -0.0018(10) 
C14 0.0232(14) 0.0233(14) 0.0154(12) 0.0003(10) 0.0001(10) -0.0050(11) 
C15 0.0203(13) 0.0165(13) 0.0171(12) 0.0006(10) 0.0024(10) 0.0004(10) 
C16 0.0186(12) 0.0152(12) 0.0158(12) 0.0008(10) -0.0034(9) -0.0037(10) 
C17 0.0224(14) 0.0243(15) 0.0207(13) 0.0011(11) 0.0000(10) 0.0037(11) 
C18 0.0247(14) 0.0206(14) 0.0267(15) 0.0036(11) -0.0050(11) 0.0037(11) 
C19 0.0294(15) 0.0222(15) 0.0234(14) 0.0063(11) -0.0048(11) -0.0080(11) 
C120 0.0257(15) 0.0281(16) 0.0215(14) 0.0024(11) 0.0025(11) -0.0055(11) 
C121 0.0198(13) 0.0183(13) 0.0227(13) -0.0025(10) -0.0003(10) -0.0018(10) 
C122 0.0235(13) 0.0160(13) 0.0111(11) -0.0014(9) 0.0017(9) 0.0006(10) 
C123 0.0196(13) 0.0215(14) 0.0250(14) -0.0010(11) 0.0030(11) 0.0024(10) 
C124 0.0239(14) 0.0229(15) 0.0307(15) -0.0046(12) -0.0010(11) -0.0045(11) 
C125 0.0341(16) 0.0146(13) 0.0273(15) -0.0018(11) 0.0017(12) 0.0000(11) 
C126 0.0251(14) 0.0169(13) 0.0263(14) -0.0018(11) 0.0024(11) 0.0054(11) 
C127 0.0213(13) 0.0182(13) 0.0203(13) -0.0014(10) -0.0004(10) 0.0010(10) 
C128 0.0203(13) 0.0143(12) 0.0183(12) 0.0012(10) 0.0077(10) -0.0010(10) 
C129 0.0254(14) 0.0212(14) 0.0260(14) 0.0005(11) 0.0006(11) 0.0018(11) 
C90 0.0441(19) 0.0215(15) 0.0306(16) 0.0035(12) -0.0002(13) 0.0104(13) 
C91 0.048(2) 0.0174(15) 0.0309(16) 0.0045(12) 0.0147(14) 0.0067(13) 
C92 0.0350(16) 0.0165(14) 0.0276(15) -0.0039(11) 0.0102(12) -0.0041(11) 
C93 0.0249(14) 0.0168(13) 0.0225(13) -0.0002(11) 0.0047(11) -0.0023(10) 
C94 0.0183(12) 0.0159(13) 0.0166(12) 0.0001(10) -0.0032(10) 0.0025(10) 
C95 0.0203(13) 0.0206(14) 0.0237(14) -0.0031(11) -0.0012(10) 0.0006(10) 
C96 0.0218(14) 0.0329(16) 0.0206(14) -0.0015(12) 0.0056(11) 0.0026(12) 
C97 0.0314(16) 0.0279(16) 0.0184(13) -0.0067(11) -0.0025(11) 0.0067(12) 
C98 0.0282(15) 0.0206(14) 0.0211(13) -0.0035(11) -0.0051(11) -0.0023(11) 
C99 0.0240(14) 0.0187(13) 0.0165(12) 0.0036(10) -0.0018(10) -0.0007(10) 
  
_geom_special_details 
; 
 All esds (except the esd in the dihedral angle between two l.s. planes) 
 are estimated using the full covariance matrix.  The cell esds are taken 
 into account individually in the estimation of esds in distances, angles 
 and torsion angles; correlations between esds in cell parameters are only 
 used when they are defined by crystal symmetry.  An approximate (isotropic) 
 treatment of cell esds is used for estimating esds involving l.s. planes. 
; 
  
loop_ 
 _geom_bond_atom_site_label_1 
 _geom_bond_atom_site_label_2 
 _geom_bond_distance 
 _geom_bond_site_symmetry_2 
 _geom_bond_publ_flag 
Fe1 C36 2.079(3) . ? 
Fe1 C37 2.086(3) . ? 
Fe1 C38 2.107(3) . ? 
Fe1 C35 2.111(3) . ? 
Fe1 C34 2.120(3) . ? 
Fe1 P3 2.1969(7) . ? 
Fe1 P2 2.2021(7) . ? 
Fe1 P1 2.2130(8) . ? 
P1 C24 1.836(3) . ? 
P1 C100 1.849(3) . ? 
P1 C20 1.859(3) . ? 
P2 C16 1.838(3) . ? 
P2 C122 1.847(3) . ? 
P2 C21 1.852(3) . ? 
P3 C128 1.831(3) . ? 
P3 C94 1.839(3) . ? 
P3 C22 1.850(3) . ? 
O3 C1 1.352(3) . ? 
O3 C12 1.445(4) . ? 
O1 C1 1.204(3) . ? 
O4 C11 1.352(3) . ? 
O4 C13 1.444(3) . ? 
O2 C11 1.206(3) . ? 
C3 C2 1.201(4) . ? 
C3 C4 1.412(4) . ? 
C2 C1 1.435(4) . ? 
C9 C10 1.198(4) . ? 
C9 C8 1.408(4) . ? 
C10 C11 1.427(4) . ? 
C4 C5 1.415(4) . ? 
C4 C8 1.441(4) . ? 
C8 C7 1.406(4) . ? 
C7 C6 1.395(4) . ? 
C6 C5 1.390(4) . ? 
C34 C35 1.360(5) . ? 
C34 C38 1.372(5) . ? 
C35 C36 1.388(7) . ? 
C36 C37 1.483(6) . ? 
C37 C38 1.388(4) . ? 
C39 C20 1.530(4) . ? 
C39 C23 1.533(3) . ? 
C39 C21 1.536(3) . ? 
C39 C22 1.540(4) . ? 
C24 C25 1.382(4) . ? 
C24 C29 1.401(4) . ? 
C25 C26 1.387(4) . ? 
C26 C27 1.375(4) . ? 
C27 C28 1.389(4) . ? 
C28 C29 1.381(4) . ? 
C100 C15 1.386(4) . ? 
C100 C101 1.404(4) . ? 
C101 C102 1.388(4) . ? 
C102 C103 1.388(4) . ? 
C103 C14 1.382(4) . ? 
C14 C15 1.390(4) . ? 
C16 C17 1.389(4) . ? 
C16 C121 1.399(4) . ? 
C17 C18 1.395(4) . ? 
C18 C19 1.374(4) . ? 
C19 C120 1.392(4) . ? 
C120 C121 1.383(4) . ? 
C122 C127 1.385(4) . ? 
C122 C123 1.403(4) . ? 
C123 C124 1.382(4) . ? 
C124 C125 1.388(4) . ? 
C125 C126 1.376(4) . ? 
C126 C127 1.388(4) . ? 
C128 C93 1.395(4) . ? 
C128 C129 1.399(4) . ? 
C129 C90 1.390(4) . ? 
C90 C91 1.378(5) . ? 
C91 C92 1.369(4) . ? 
C92 C93 1.390(4) . ? 
C94 C99 1.397(4) . ? 
C94 C95 1.398(4) . ? 
C95 C96 1.382(4) . ? 
C96 C97 1.400(4) . ? 
C97 C98 1.364(4) . ? 
C98 C99 1.403(4) . ? 
  
loop_ 
 _geom_angle_atom_site_label_1 
 _geom_angle_atom_site_label_2 
 _geom_angle_atom_site_label_3 
 _geom_angle 
 _geom_angle_site_symmetry_1 
 _geom_angle_site_symmetry_3 
 _geom_angle_publ_flag 
C36 Fe1 C37 41.72(18) . . ? 
C36 Fe1 C38 65.45(13) . . ? 
C37 Fe1 C38 38.66(13) . . ? 
C36 Fe1 C35 38.69(19) . . ? 
C37 Fe1 C35 66.81(15) . . ? 
C38 Fe1 C35 63.75(14) . . ? 
C36 Fe1 C34 64.35(16) . . ? 
C37 Fe1 C34 65.31(13) . . ? 
C38 Fe1 C34 37.87(12) . . ? 
C35 Fe1 C34 37.48(15) . . ? 
C36 Fe1 P3 109.53(15) . . ? 
C37 Fe1 P3 151.25(12) . . ? 
C38 Fe1 P3 143.92(9) . . ? 
C35 Fe1 P3 89.78(11) . . ? 
C34 Fe1 P3 106.42(10) . . ? 
C36 Fe1 P2 156.00(11) . . ? 
C37 Fe1 P2 116.02(12) . . ? 
C38 Fe1 P2 91.09(9) . . ? 
C35 Fe1 P2 135.84(12) . . ? 
C34 Fe1 P2 100.65(11) . . ? 
P3 Fe1 P2 92.29(3) . . ? 
C36 Fe1 P1 100.60(14) . . ? 
C37 Fe1 P1 95.40(10) . . ? 
C38 Fe1 P1 126.25(9) . . ? 
C35 Fe1 P1 135.10(12) . . ? 
C34 Fe1 P1 160.64(10) . . ? 
P3 Fe1 P1 89.73(3) . . ? 
P2 Fe1 P1 89.03(3) . . ? 
C24 P1 C100 96.58(11) . . ? 
C24 P1 C20 99.54(12) . . ? 
C100 P1 C20 106.03(12) . . ? 
C24 P1 Fe1 123.78(9) . . ? 
C100 P1 Fe1 114.58(8) . . ? 
C20 P1 Fe1 113.61(9) . . ? 
C16 P2 C122 98.45(12) . . ? 
C16 P2 C21 100.08(12) . . ? 
C122 P2 C21 104.18(12) . . ? 
C16 P2 Fe1 121.08(9) . . ? 
C122 P2 Fe1 116.01(8) . . ? 
C21 P2 Fe1 114.27(8) . . ? 
C128 P3 C94 98.92(12) . . ? 
C128 P3 C22 100.42(12) . . ? 
C94 P3 C22 105.14(12) . . ? 
C128 P3 Fe1 121.82(9) . . ? 
C94 P3 Fe1 114.89(9) . . ? 
C22 P3 Fe1 113.25(8) . . ? 
C1 O3 C12 114.8(2) . . ? 
C11 O4 C13 115.6(2) . . ? 
C2 C3 C4 179.6(3) . . ? 
C3 C2 C1 176.3(3) . . ? 
O1 C1 O3 123.0(3) . . ? 
O1 C1 C2 125.8(3) . . ? 
O3 C1 C2 111.2(2) . . ? 
C10 C9 C8 178.0(3) . . ? 
C9 C10 C11 171.4(3) . . ? 
O2 C11 O4 122.6(3) . . ? 
O2 C11 C10 125.6(3) . . ? 
O4 C11 C10 111.8(2) . . ? 
C3 C4 C5 126.6(3) . . ? 
C3 C4 C8 126.6(2) . . ? 
C5 C4 C8 106.7(2) . . ? 
C7 C8 C9 125.9(3) . . ? 
C7 C8 C4 107.6(2) . . ? 
C9 C8 C4 126.4(2) . . ? 
C6 C7 C8 108.0(3) . . ? 
C5 C6 C7 109.4(3) . . ? 
C6 C5 C4 108.3(3) . . ? 
C35 C34 C38 109.3(3) . . ? 
C35 C34 Fe1 70.9(2) . . ? 
C38 C34 Fe1 70.52(17) . . ? 
C34 C35 C36 108.9(3) . . ? 
C34 C35 Fe1 71.63(19) . . ? 
C36 C35 Fe1 69.4(2) . . ? 
C35 C36 C37 107.1(3) . . ? 
C35 C36 Fe1 71.9(2) . . ? 
C37 C36 Fe1 69.37(17) . . ? 
C38 C37 C36 104.0(3) . . ? 
C38 C37 Fe1 71.49(17) . . ? 
C36 C37 Fe1 68.91(18) . . ? 
C34 C38 C37 110.7(3) . . ? 
C34 C38 Fe1 71.61(17) . . ? 
C37 C38 Fe1 69.85(17) . . ? 
C20 C39 C23 108.0(2) . . ? 
C20 C39 C21 110.2(2) . . ? 
C23 C39 C21 107.4(2) . . ? 
C20 C39 C22 113.3(2) . . ? 
C23 C39 C22 106.2(2) . . ? 
C21 C39 C22 111.5(2) . . ? 
C39 C20 P1 116.98(18) . . ? 
C39 C21 P2 116.62(17) . . ? 
C39 C22 P3 117.05(18) . . ? 
C25 C24 C29 118.6(2) . . ? 
C25 C24 P1 125.4(2) . . ? 
C29 C24 P1 115.91(19) . . ? 
C24 C25 C26 120.7(2) . . ? 
C27 C26 C25 120.2(2) . . ? 
C26 C27 C28 119.9(2) . . ? 
C29 C28 C27 119.9(3) . . ? 
C28 C29 C24 120.6(2) . . ? 
C15 C100 C101 118.2(2) . . ? 
C15 C100 P1 124.7(2) . . ? 
C101 C100 P1 117.05(19) . . ? 
C102 C101 C100 120.9(2) . . ? 
C103 C102 C101 119.9(2) . . ? 
C14 C103 C102 119.7(2) . . ? 
C103 C14 C15 120.3(2) . . ? 
C100 C15 C14 121.0(2) . . ? 
C17 C16 C121 118.8(2) . . ? 
C17 C16 P2 123.6(2) . . ? 
C121 C16 P2 117.5(2) . . ? 
C16 C17 C18 120.7(3) . . ? 
C19 C18 C17 119.7(3) . . ? 
C18 C19 C120 120.2(3) . . ? 
C121 C120 C19 120.1(3) . . ? 
C120 C121 C16 120.3(3) . . ? 
C127 C122 C123 118.1(2) . . ? 
C127 C122 P2 123.7(2) . . ? 
C123 C122 P2 118.1(2) . . ? 
C124 C123 C122 120.4(3) . . ? 
C123 C124 C125 120.7(3) . . ? 
C126 C125 C124 119.2(3) . . ? 
C125 C126 C127 120.4(3) . . ? 
C122 C127 C126 121.1(3) . . ? 
C93 C128 C129 118.3(2) . . ? 
C93 C128 P3 123.1(2) . . ? 
C129 C128 P3 118.5(2) . . ? 
C90 C129 C128 120.6(3) . . ? 
C91 C90 C129 120.2(3) . . ? 
C92 C91 C90 119.8(3) . . ? 
C91 C92 C93 120.9(3) . . ? 
C92 C93 C128 120.2(3) . . ? 
C99 C94 C95 118.5(2) . . ? 
C99 C94 P3 123.4(2) . . ? 
C95 C94 P3 118.1(2) . . ? 
C96 C95 C94 121.0(3) . . ? 
C95 C96 C97 120.0(3) . . ? 
C98 C97 C96 119.6(3) . . ? 
C97 C98 C99 120.9(3) . . ? 
C94 C99 C98 119.9(3) . . ? 
  
_diffrn_measured_fraction_theta_max    0.971 
_diffrn_reflns_theta_full              27.51 
_diffrn_measured_fraction_theta_full   0.971 
_refine_diff_density_max    3.118 
_refine_diff_density_min   -0.502 
_refine_diff_density_rms    0.089 
